# Supplementary figures and images for: Beyond GWAS—Could Genetic Differentiation within the Allograft Rejection Pathway Shape Natural Immunity to COVID-19?
Source: MDPI journal article supplement (doi:10.3390/ijms23116272), 2022-06-03

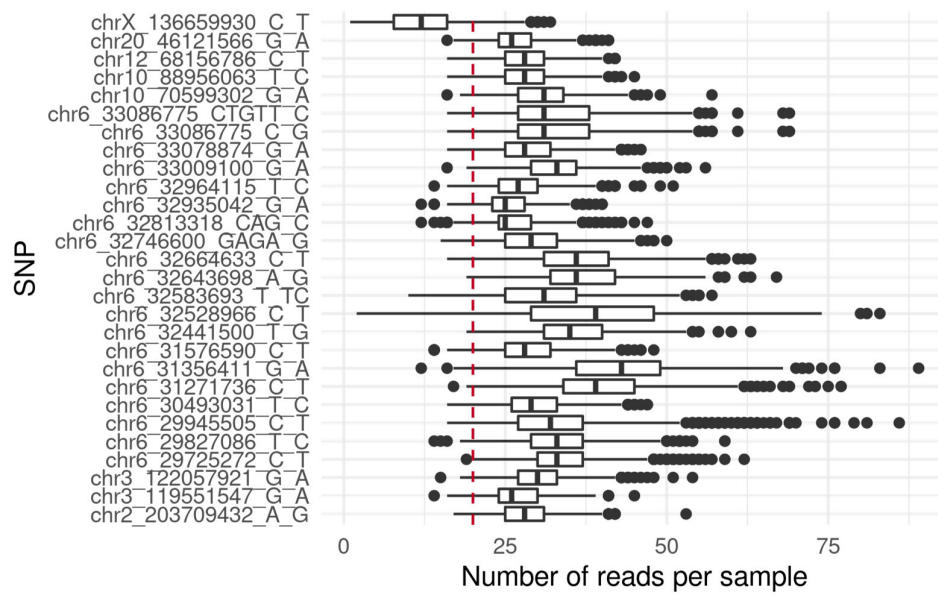

Figure S1. Number of reads per sample.

Supplement: s1 [file s1]
